# Supplementary material
Source: PubMed Central journal article supplement (PMC3518657)

# Supplementary Figure 1

a

ManLAM dose response curve:

CCL21

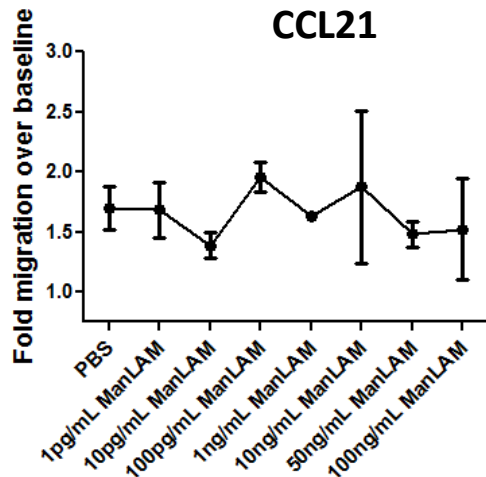

b

ManLAM dose response curve:

S1P

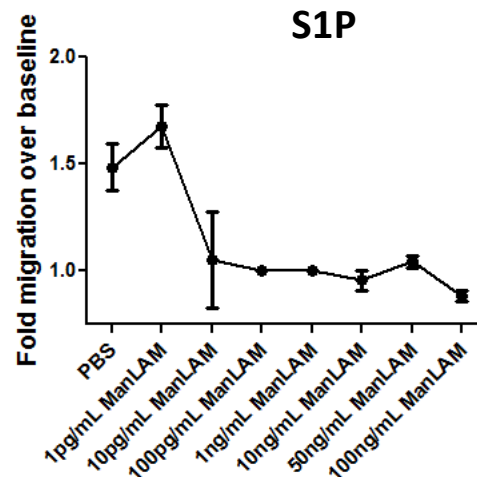

c

S1P Dose response curve

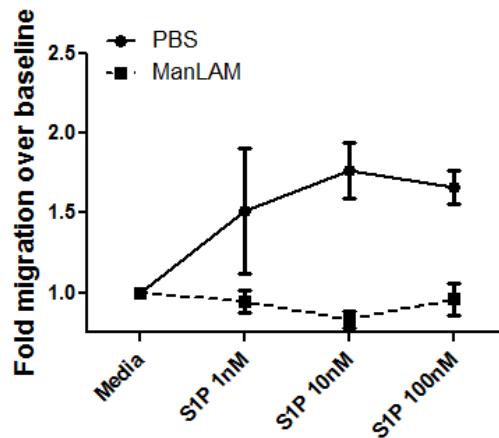

Supplement: NIHMS415234-supplement-2.pdf [file NIHMS415234-supplement-2.pdf]
