# Supplementary material
Source: PubMed Central journal article supplement (PMC3518657)

# Supplementary Figure 2

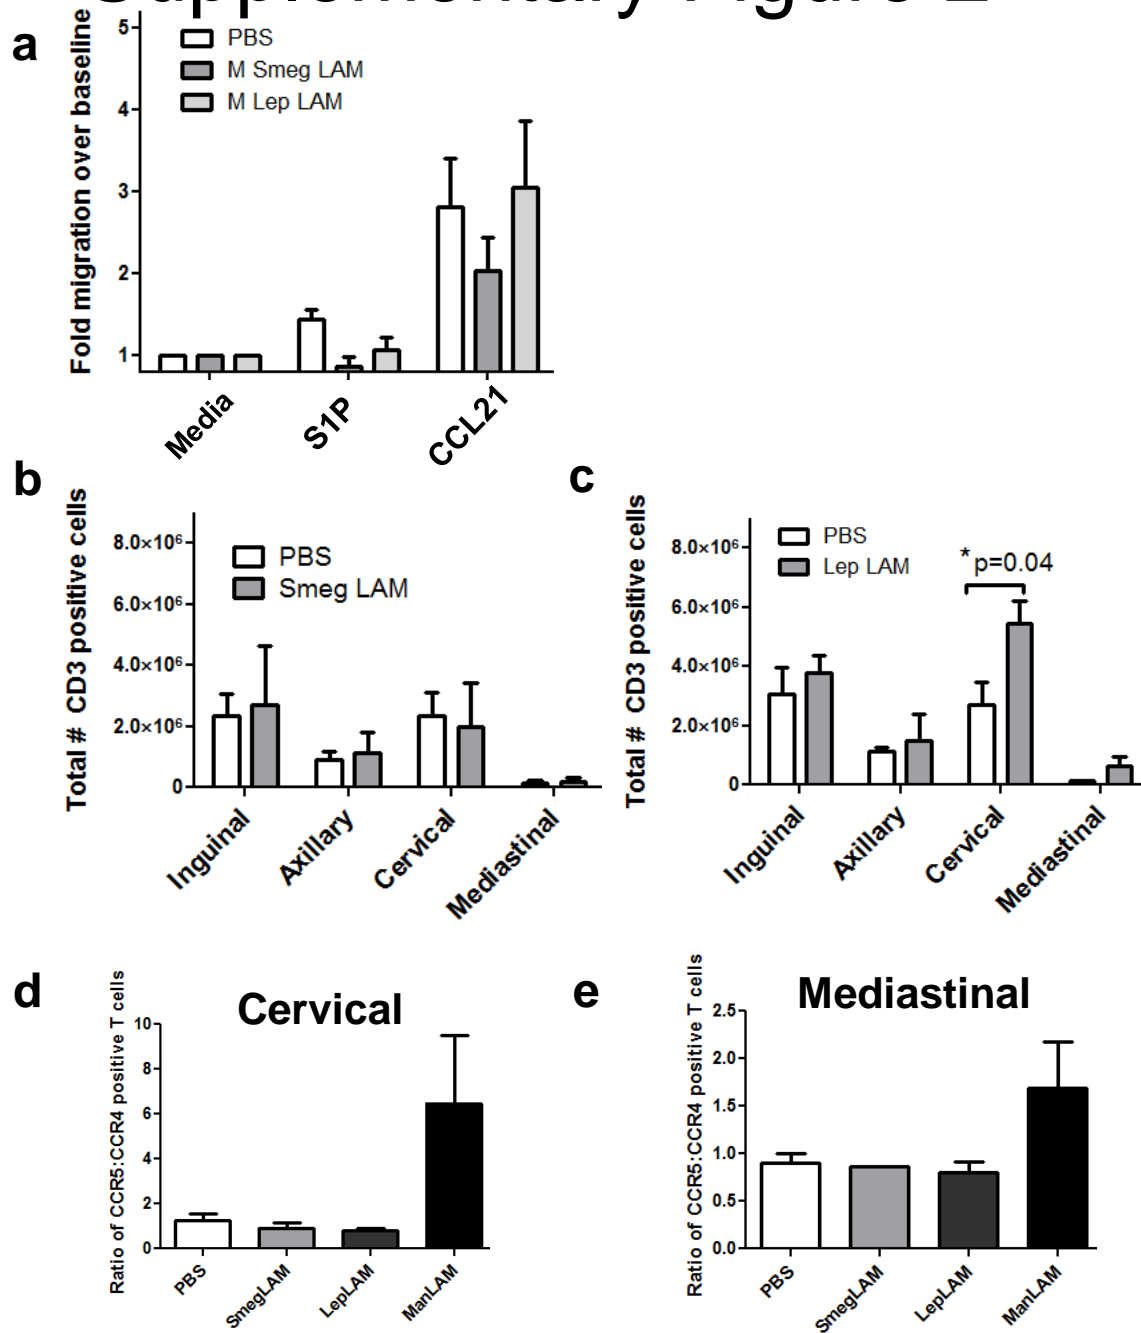

Supplement: NIHMS415234-supplement-3.pdf [file NIHMS415234-supplement-3.pdf]
